# Supplementary material
Source: PubMed Central journal article supplement (PMC9848773)
Supplement: NIHMS1850259-supplement-Supplementary_Material.pdf [file NIHMS1850259-supplement-Supplementary_Material.pdf]

## Supplementary Materials

**Table S1.** Participant Characteristics by Site.

|                           | <b>Providence, RI</b>                                                                                                                                                                                                                              | <b>Athens, GA</b>                                                                                                                                                                                                                                 | <b>Aiken, SC</b>                                                                                                                                                                                                                                      |
|---------------------------|----------------------------------------------------------------------------------------------------------------------------------------------------------------------------------------------------------------------------------------------------|---------------------------------------------------------------------------------------------------------------------------------------------------------------------------------------------------------------------------------------------------|-------------------------------------------------------------------------------------------------------------------------------------------------------------------------------------------------------------------------------------------------------|
| <b>N</b>                  | 118                                                                                                                                                                                                                                                | 904                                                                                                                                                                                                                                               | 52                                                                                                                                                                                                                                                    |
| <b>Sex</b>                | 59% M; 41% F                                                                                                                                                                                                                                       | 61% M; 39% F                                                                                                                                                                                                                                      | 46% M; 54% F                                                                                                                                                                                                                                          |
| <b>Race</b>               | White (70%)<br>African American (18%)<br>American Ind. or Alaskan native (2%)<br>Asian (2%)<br>Pacific Islander – (0%)<br>Mixed Race (7%)<br>Other (1%)                                                                                            | White (67%)<br>African American (26%)<br>American Ind. or Alaskan native (.4%)<br>Asian (3%)<br>Pacific Islander (.1%)<br>Mixed Race (3%)<br>Other (1%)                                                                                           | White (77%)<br>African American (19%)<br>American Ind. or Alaskan native (0%)<br>Asian (0%)<br>Pacific Islander (0%)<br>Mixed Race (4%)<br>Other (0%)                                                                                                 |
| <b>Hispanic Ethnicity</b> | 5.1%                                                                                                                                                                                                                                               | 2.1%                                                                                                                                                                                                                                              | 1.9%                                                                                                                                                                                                                                                  |
| <b>Income</b>             | Less than \$15,000 (51%)<br>\$15,000-\$29,999 (22%)<br>\$30,000-\$44,999 (11%)<br>\$45,000-\$59,999 (4%)<br>\$60,000-\$74,999 (5%)<br>\$75,000-\$89,999 (3%)<br>\$90,000-\$104,999 (0%)<br>\$105,000-\$119,999 (1%)<br>Greater than \$120,000 (3%) | Less than \$15,000 (52%)<br>\$15,000-\$29,999 (22%)<br>\$30,000-\$44,999 (7%)<br>\$45,000-\$59,999 (4%)<br>\$60,000-\$74,999 (3%)<br>\$75,000-\$89,999 (3%)<br>\$90,000-\$104,999 (2%)<br>\$105,000-\$119,999 (2%)<br>Greater than \$120,000 (5%) | Less than \$15,000 (20%)<br>\$15,000-\$29,999 (8%)<br>\$30,000-\$44,999 (10%)<br>\$45,000-\$59,999 (8%)<br>\$60,000-\$74,999 (14%)<br>\$75,000-\$89,999 (10%)<br>\$90,000-\$104,999 (4%)<br>\$105,000-\$119,999 (14%)<br>Greater than \$120,000 (12%) |
| <b>YrsEd</b>              | 13.14 (2.51)                                                                                                                                                                                                                                       | 12.78 (2.20)                                                                                                                                                                                                                                      | 12.67 (1.59)                                                                                                                                                                                                                                          |
| <b>Age</b>                | 37.01 (12.50)                                                                                                                                                                                                                                      | 31.52 (12.54)                                                                                                                                                                                                                                     | 21.02 (6.55)                                                                                                                                                                                                                                          |
| <b>C/D</b>                | 20.40 (10.20)                                                                                                                                                                                                                                      | 16.14 (11.48)                                                                                                                                                                                                                                     | 9.95 (6.19)                                                                                                                                                                                                                                           |
| <b>FTND</b>               | 5.33 (2.50)                                                                                                                                                                                                                                        | 4.13 (2.44)                                                                                                                                                                                                                                       | 2.35 (2.08)                                                                                                                                                                                                                                           |
| <b>C/P</b>                | \$5.74 (\$1.05)                                                                                                                                                                                                                                    | \$4.42 (\$0.82)                                                                                                                                                                                                                                   | \$4.71 (\$0.74)                                                                                                                                                                                                                                       |

Note: YrsEd = Years of education; C/D = self-reported cigarettes smoked/day; FTND = calculated score on Fagerström Test of Nicotine Dependence; C/P = cost/pack

Comparisons between sites revealed significant differences between all three sites in age, cigarettes/day, and FTND ( $ps < .001$ ); significant differences in income between both Providence and Athens compared to Aiken ( $ps < .001$ ), but not between each other; and no differences in education.

**Table S2.** Complete estimates of making a smoking cessation attempt. Items in darker gray and bolded reflect illustrative ‘left-digit’ transitions. Pts at 100% reflects proportion of participants who reported 100% probability of a quit attempt at each price; %ΔQA: proportionate change in probability of quit attempt; %ΔP: proportionate change in cigarette price; *d*: effect size (Cohen’s *d*)

| Unit Price    | Pack Price    | QA Mean      | 95% CI       | Increase    | % Increase    | % Price Increase | %ΔQA / %ΔP  | Cohen’s <i>d</i> | Median     | % at P <sub>50</sub> | % at BP       |
|---------------|---------------|--------------|--------------|-------------|---------------|------------------|-------------|------------------|------------|----------------------|---------------|
| \$0.00        | \$0.00        | 11.39        | 9.96 - 12.82 | -           | -             | -                | -           | -                | 0%         | 13.59%               | 3.17%         |
| \$0.01        | \$0.20        | 11.45        | 10.03 -12.87 | 0.06        | 0.55%         | -                | -           | 0.01             | 0%         | 13.69%               | 3.26%         |
| \$0.02        | \$0.40        | 11.50        | 10.07 -12.93 | 0.05        | 0.44%         | 100.00%          | 0.00        | 0.08             | 0%         | 13.78%               | 3.26%         |
| \$0.03        | \$0.60        | 11.55        | 10.12 -12.98 | 0.05        | 0.42%         | 50.00%           | 0.01        | 0.06             | 0%         | 13.78%               | 3.26%         |
| <b>\$0.04</b> | <b>\$0.80</b> | <b>11.85</b> | 10.40 -13.30 | <b>0.30</b> | <b>2.64%</b>  | <b>33.33%</b>    | <b>0.08</b> | <b>0.06</b>      | <b>0%</b>  | <b>14.06%</b>        | <b>3.54%</b>  |
| <b>\$0.05</b> | <b>\$1.00</b> | <b>11.98</b> | 10.52 -13.44 | <b>0.13</b> | <b>1.12%</b>  | <b>25.00%</b>    | <b>0.04</b> | <b>0.06</b>      | <b>0%</b>  | <b>14.06%</b>        | <b>3.63%</b>  |
| \$0.06        | \$1.20        | 12.19        | 10.72 -13.66 | 0.21        | 1.76%         | 20.00%           | 0.09        | 0.10             | 0%         | 14.15%               | 3.63%         |
| \$0.07        | \$1.40        | 12.27        | 10.80 -13.74 | 0.08        | 0.66%         | 16.67%           | 0.04        | 0.07             | 0%         | 14.25%               | 3.63%         |
| \$0.08        | \$1.60        | 12.40        | 10.92 -13.88 | 0.13        | 1.04%         | 14.29%           | 0.07        | 0.08             | 0%         | 14.25%               | 3.72%         |
| <b>\$0.09</b> | <b>\$1.80</b> | <b>12.48</b> | 11.00 -13.96 | <b>0.08</b> | <b>0.61%</b>  | <b>12.50%</b>    | <b>0.05</b> | <b>0.11</b>      | <b>0%</b>  | <b>14.25%</b>        | <b>3.82%</b>  |
| <b>\$0.10</b> | <b>\$2.00</b> | <b>13.06</b> | 11.57 -14.55 | <b>0.58</b> | <b>4.66%</b>  | <b>11.11%</b>    | <b>0.42</b> | <b>0.17</b>      | <b>0%</b>  | <b>14.71%</b>        | <b>3.82%</b>  |
| \$0.11        | \$2.20        | 13.41        | 11.90 -14.92 | 0.35        | 2.65%         | 10.00%           | 0.27        | 0.14             | 0%         | 14.90%               | 3.91%         |
| \$0.12        | \$2.40        | 13.65        | 12.13 -15.17 | 0.24        | 1.81%         | 9.09%            | 0.20        | 0.08             | 0%         | 15.18%               | 4.00%         |
| \$0.13        | \$2.60        | 13.87        | 12.34 -15.40 | 0.22        | 1.61%         | 8.33%            | 0.19        | 0.08             | 0%         | 15.27%               | 4.10%         |
| <b>\$0.14</b> | <b>\$2.80</b> | <b>14.00</b> | 12.47 -15.53 | <b>0.13</b> | <b>0.96%</b>  | <b>7.69%</b>     | <b>0.12</b> | <b>0.11</b>      | <b>0%</b>  | <b>15.27%</b>        | <b>4.10%</b>  |
| <b>\$0.15</b> | <b>\$3.00</b> | <b>14.96</b> | 13.41 -16.51 | <b>0.96</b> | <b>6.84%</b>  | <b>7.14%</b>     | <b>0.96</b> | <b>0.22</b>      | <b>0%</b>  | <b>15.92%</b>        | <b>4.10%</b>  |
| \$0.16        | \$3.20        | 15.69        | 14.12 -17.26 | 0.73        | 4.88%         | 6.67%            | 0.73        | 0.15             | 0%         | 16.85%               | 4.19%         |
| \$0.17        | \$3.40        | 15.95        | 14.37 -17.53 | 0.26        | 1.65%         | 6.25%            | 0.26        | 0.14             | 0%         | 16.95%               | 4.19%         |
| \$0.18        | \$3.60        | 16.52        | 14.92 -18.12 | 0.57        | 3.61%         | 5.88%            | 0.61        | 0.16             | 0%         | 17.50%               | 4.19%         |
| <b>\$0.19</b> | <b>\$3.80</b> | <b>17.03</b> | 15.41 -18.65 | <b>0.51</b> | <b>3.05%</b>  | <b>5.56%</b>     | <b>0.55</b> | <b>0.11</b>      | <b>0%</b>  | <b>17.97%</b>        | <b>4.38%</b>  |
| <b>\$0.20</b> | <b>\$4.00</b> | <b>19.35</b> | 17.67 -21.03 | <b>2.32</b> | <b>13.67%</b> | <b>5.26%</b>     | <b>2.60</b> | <b>0.26</b>      | <b>0%</b>  | <b>21.32%</b>        | <b>4.84%</b>  |
| \$0.21        | \$4.20        | 21.02        | 19.31 -22.73 | 1.67        | 8.60%         | 5.00%            | 1.72        | 0.22             | 1%         | 23.46%               | 5.12%         |
| \$0.22        | \$4.40        | 22.73        | 21.00 -24.46 | 1.71        | 8.13%         | 4.76%            | 1.71        | 0.17             | 10%        | 25.79%               | 5.21%         |
| \$0.23        | \$4.60        | 23.58        | 21.82 -25.34 | 0.85        | 3.74%         | 4.55%            | 0.82        | 0.21             | 10%        | 26.44%               | 5.49%         |
| <b>\$0.24</b> | <b>\$4.80</b> | <b>24.36</b> | 22.56 -26.16 | <b>0.78</b> | <b>3.30%</b>  | <b>4.35%</b>     | <b>0.76</b> | <b>0.19</b>      | <b>10%</b> | <b>27.00%</b>        | <b>5.77%</b>  |
| <b>\$0.25</b> | <b>\$5.00</b> | <b>29.58</b> | 27.63 -31.53 | <b>5.22</b> | <b>21.44%</b> | <b>4.17%</b>     | <b>5.15</b> | <b>0.36</b>      | <b>20%</b> | <b>34.17%</b>        | <b>8.47%</b>  |
| \$0.26        | \$5.20        | 33.62        | 31.60 -35.64 | 4.04        | 13.68%        | 4.00%            | 3.42        | 0.30             | 25%        | 38.27%               | 10.99%        |
| \$0.27        | \$5.40        | 35.43        | 33.38 -37.48 | 1.81        | 5.38%         | 3.85%            | 1.40        | 0.20             | 25%        | 40.41%               | 12.10%        |
| \$0.28        | \$5.60        | 36.96        | 34.89 -39.03 | 1.53        | 4.32%         | 3.70%            | 1.17        | 0.21             | 30%        | 42.09%               | 12.85%        |
| <b>\$0.29</b> | <b>\$5.80</b> | <b>38.39</b> | 36.30 -40.48 | <b>1.43</b> | <b>3.86%</b>  | <b>3.57%</b>     | <b>1.08</b> | <b>0.22</b>      | <b>30%</b> | <b>43.58%</b>        | <b>13.51%</b> |
| <b>\$0.30</b> | <b>\$6.00</b> | <b>45.03</b> | 42.88 -47.18 | <b>6.64</b> | <b>17.29%</b> | <b>3.45%</b>     | <b>5.01</b> | <b>0.44</b>      | <b>50%</b> | <b>51.02%</b>        | <b>18.62%</b> |
| \$0.31        | \$6.20        | 48.00        | 45.84 -50.16 | 2.97        | 6.61%         | 3.33%            | 1.98        | 0.25             | 50%        | 54.38%               | 20.67%        |
| \$0.32        | \$6.40        | 49.25        | 47.10 -51.40 | 1.25        | 2.61%         | 3.23%            | 0.81        | 0.20             | 50%        | 56.24%               | 21.04%        |
| \$0.33        | \$6.60        | 50.62        | 48.46 -52.78 | 1.37        | 2.79%         | 3.13%            | 0.89        | 0.21             | 50%        | 57.73%               | 21.97%        |
| <b>\$0.34</b> | <b>\$6.80</b> | <b>52.10</b> | 49.93 -54.27 | <b>1.48</b> | <b>2.91%</b>  | <b>3.03%</b>     | <b>0.96</b> | <b>0.22</b>      | <b>50%</b> | <b>58.85%</b>        | <b>23.21%</b> |
| <b>\$0.35</b> | <b>\$7.00</b> | <b>57.79</b> | 55.63 -59.95 | <b>5.69</b> | <b>10.94%</b> | <b>2.94%</b>     | <b>3.72</b> | <b>0.43</b>      | <b>51%</b> | <b>64.90%</b>        | <b>29.24%</b> |
| \$0.36        | \$7.20        | 60.08        | 57.92 -62.24 | 2.29        | 3.96%         | 2.86%            | 1.39        | 0.25             | 60%        | 67.60%               | 32.12%        |
| \$0.37        | \$7.40        | 61.20        | 59.05 -63.35 | 1.12        | 1.86%         | 2.78%            | 0.67        | 0.18             | 65%        | 68.53%               | 32.96%        |

|               |                |              |                     |             |              |              |             |             |             |               |               |
|---------------|----------------|--------------|---------------------|-------------|--------------|--------------|-------------|-------------|-------------|---------------|---------------|
| \$0.38        | \$7.60         | 62.03        | 59.90 -64.16        | 0.83        | 1.35%        | 2.70%        | 0.50        | 0.16        | 70%         | 69.55%        | 33.71%        |
| <b>\$0.39</b> | <b>\$7.80</b>  | <b>62.74</b> | 60.61 -64.87        | <b>0.71</b> | <b>1.15%</b> | <b>2.63%</b> | <b>0.44</b> | <b>0.20</b> | <b>70%</b>  | <b>70.11%</b> | <b>34.36%</b> |
| <b>\$0.40</b> | <b>\$8.00</b>  | <b>67.24</b> | 65.14 -69.34        | <b>4.50</b> | <b>7.17%</b> | <b>2.56%</b> | <b>2.80</b> | <b>0.41</b> | <b>75%</b>  | <b>74.49%</b> | <b>40.32%</b> |
| \$0.41        | \$8.20         | 68.57        | 66.49 -70.65        | 1.33        | 1.97%        | 2.50%        | 0.79        | 0.23        | 80%         | 75.51%        | 41.62%        |
| \$0.42        | \$8.40         | 69.18        | 67.11 -71.25        | 0.61        | 0.89%        | 2.44%        | 0.36        | 0.20        | 80%         | 76.07%        | 42.18%        |
| \$0.43        | \$8.60         | 69.77        | 67.71 -71.83        | 0.59        | 0.85%        | 2.38%        | 0.36        | 0.18        | 80%         | 76.44%        | 42.74%        |
| <b>\$0.44</b> | <b>\$8.80</b>  | <b>70.25</b> | <b>68.19 -72.31</b> | <b>0.48</b> | <b>0.68%</b> | <b>2.33%</b> | <b>0.29</b> | <b>0.21</b> | <b>85%</b>  | <b>76.63%</b> | <b>43.11%</b> |
| <b>\$0.45</b> | <b>\$9.00</b>  | <b>72.99</b> | <b>70.97 -75.01</b> | <b>2.74</b> | <b>3.90%</b> | <b>2.27%</b> | <b>1.72</b> | <b>0.36</b> | <b>90%</b>  | <b>79.70%</b> | <b>47.39%</b> |
| \$0.46        | \$9.20         | 74.21        | 72.22 -76.20        | 1.22        | 1.68%        | 2.22%        | 0.76        | 0.22        | 95%         | 80.91%        | 48.70%        |
| \$0.47        | \$9.40         | 74.58        | 72.60 -76.56        | 0.37        | 0.50%        | 2.17%        | 0.23        | 0.15        | 95%         | 81.47%        | 49.07%        |
| \$0.48        | \$9.60         | 75.06        | 73.08 -77.04        | 0.48        | 0.64%        | 2.13%        | 0.30        | 0.19        | 99%         | 81.84%        | 49.81%        |
| <b>\$0.49</b> | <b>\$9.80</b>  | <b>75.44</b> | <b>73.47 -77.41</b> | <b>0.38</b> | <b>0.50%</b> | <b>2.08%</b> | <b>0.24</b> | <b>0.19</b> | <b>100%</b> | <b>82.31%</b> | <b>50.09%</b> |
| <b>\$0.50</b> | <b>\$10.00</b> | <b>79.08</b> | <b>77.22 -80.94</b> | <b>3.64</b> | <b>4.83%</b> | <b>2.04%</b> | <b>2.37</b> | <b>0.36</b> | <b>100%</b> | <b>85.85%</b> | <b>55.96%</b> |
| \$0.54        | \$10.80        | 80.75        | 78.96 -82.54        | 1.67        | 2.11%        | 8.00%        | 0.26        | 0.20        | 100%        | 87.24%        | 58.66%        |
| \$0.58        | \$11.60        | 81.97        | 80.24 -83.70        | 1.22        | 1.51%        | 7.41%        | 0.20        | 0.17        | 100%        | 88.27%        | 60.43%        |
| \$0.62        | \$12.40        | 84.06        | 82.41 -85.70        | 2.09        | 2.55%        | 6.90%        | 0.37        | 0.25        | 100%        | 90.32%        | 63.59%        |
| \$0.66        | \$13.20        | 84.97        | 83.36 -86.58        | 0.91        | 1.09%        | 6.45%        | 0.17        | 0.17        | 100%        | 91.34%        | 64.90%        |
| \$0.70        | \$14.00        | 85.95        | 84.38 -87.52        | 0.98        | 1.16%        | 6.06%        | 0.19        | 0.26        | 100%        | 92.18%        | 67.04%        |
| \$0.74        | \$14.80        | 86.54        | 84.99 -88.09        | 0.59        | 0.68%        | 5.71%        | 0.12        | 0.18        | 100%        | 92.36%        | 68.16%        |
| \$0.78        | \$15.60        | 87.51        | 85.99 -89.03        | 0.97        | 1.13%        | 5.41%        | 0.21        | 0.20        | 100%        | 92.74%        | 69.93%        |
| \$0.82        | \$16.40        | 88.10        | 86.60 -89.60        | 0.59        | 0.67%        | 5.13%        | 0.13        | 0.16        | 100%        | 92.83%        | 71.14%        |
| \$0.86        | \$17.20        | 88.73        | 87.27 -90.19        | 0.63        | 0.71%        | 4.88%        | 0.15        | 0.14        | 100%        | 93.39%        | 72.35%        |
| \$0.90        | \$18.00        | 89.34        | 87.90 -90.78        | 0.61        | 0.70%        | 4.65%        | 0.15        | 0.22        | 100%        | 93.85%        | 73.65%        |
| \$0.94        | \$18.80        | 89.57        | 88.14 -91.00        | 0.23        | 0.26%        | 4.44%        | 0.06        | 0.15        | 100%        | 94.04%        | 73.84%        |
| \$0.98        | \$19.60        | 89.79        | 88.37 -91.21        | 0.22        | 0.24%        | 4.26%        | 0.06        | 0.09        | 100%        | 94.04%        | 73.93%        |
| \$1.00        | \$20.00        | 91.35        | 89.99 -92.71        | 1.56        | 1.74%        | 2.04%        | 0.85        | 0.24        | 100%        | 94.69%        | 78.49%        |
| \$2.00        | \$40.00        | 92.97        | 91.72 -94.22        | 1.62        | 1.78%        | 100.00%      | 0.02        | 0.20        | 100%        | 95.53%        | 83.05%        |
| \$3.00        | \$60.00        | 93.48        | 92.26 -94.70        | 0.51        | 0.55%        | 50.00%       | 0.01        | 0.11        | 100%        | 95.90%        | 84.73%        |
| \$4.00        | \$80.00        | 93.87        | 92.66 -95.07        | 0.39        | 0.41%        | 33.33%       | 0.01        | 0.16        | 100%        | 96.09%        | 86.13%        |
| \$5.00        | \$100.00       | 94.50        | 93.35 -95.66        | 0.63        | 0.68%        | 25.00%       | 0.03        | 0.12        | 100%        | 96.55%        | 87.62%        |
| \$6.00        | \$120.00       | 94.83        | 93.70 -95.97        | 0.33        | 0.35%        | 20.00%       | 0.02        | 0.10        | 100%        | 96.65%        | 88.27%        |
| \$7.00        | \$140.00       | 95.19        | 94.09 -96.29        | 0.36        | 0.38%        | 16.67%       | 0.02        | 0.08        | 100%        | 96.83%        | 88.92%        |
| \$8.00        | \$160.00       | 95.37        | 94.28 -96.46        | 0.18        | 0.19%        | 14.29%       | 0.01        | 0.11        | 100%        | 96.93%        | 89.39%        |
| \$9.00        | \$180.00       | 95.43        | 94.34 -96.52        | 0.06        | 0.06%        | 12.50%       | 0.00        | 0.05        | 100%        | 96.93%        | 89.57%        |
| \$10.00       | \$200.00       | 95.69        | 94.62 -96.76        | 0.26        | 0.27%        | 11.11%       | 0.02        | 0.08        | 100%        | 97.02%        | 90.41%        |

**Table S3. Correlations among the PSCM indices.**

| <b>Variable</b>          | <b>1</b>             | <b>2</b>           |
|--------------------------|----------------------|--------------------|
| <b>1. Intensity</b>      | --                   |                    |
| <b>2. P<sub>50</sub></b> | -0.16 <sup>***</sup> | --                 |
| <b>3. Breakpoint</b>     | -0.13 <sup>***</sup> | .45 <sup>***</sup> |

\*\*\*  $p < .001$

## Probability of Smoking Cessation Measure (PSCM)

Below are the instructions for the PSCM and its first two items.

### PSCM

The following questions ask how likely it is that you would try to quit smoking based on the relative cost of cigarettes. Assume that you have the same income/savings that you have now and NO ACCESS to any cigarettes or nicotine products other than those offered at these prices. In addition, assume that these prices would apply to cigarettes for the foreseeable future (that is, prices will not drop in the near future). An answer of 0% reflects no intention to quit smoking at a given cost, an answer of 100% reflects a definite attempt to quit smoking at a given cost. The higher the probability, the more likely you would try to quit.

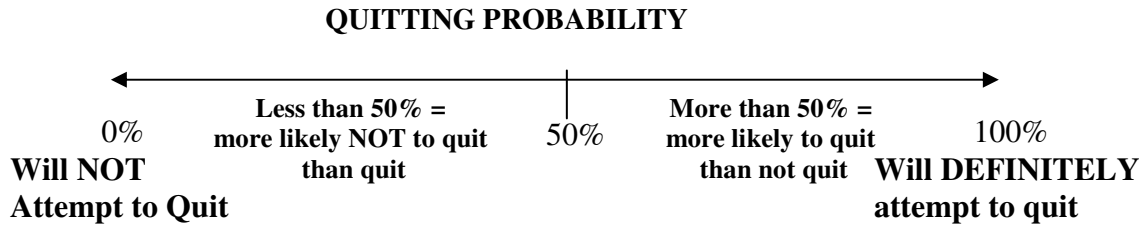

1. What is the probability you would try to quit smoking if cigarettes were FREE?      [\$0 per pack]      \_\_\_\_\_%
2. What is the probability you would try to quit smoking if cigarettes were 1¢ each?      [20¢ per pack]      \_\_\_\_\_%
